#### AUTHOR CORRECTION

For the article by Shiga *et al.* in the October 2000 issue of ANESTHESIOLOGY (2000; 93:954-8), the authors would like to make the following correction:

In the second paragraph of the abstract on page 954 and in the second paragraph on page 955, the dose of clonidine should be 4  $\mu\text{g}/\text{kg}$ , not 4  $\text{mg}/\text{kg}$ .
